# Supplementary material for: Perception and practice of household waste disposal: a participatory household survey in Calamba City, Philippines
Source: Research Square preprint supplement (doi:10.21203/rs.3.rs-119597/v1), 2020-12-10
Supplement: Supplementary file 1 [file 5f7cd227587ecd469e6c1c28.pdf]

**Key Informant Interview for Government-Run Facilities**  
**Module A: KII City Office Departments**

---

**Name of Respondent:**

**Age:**

**Office:**

**Title:**

**Interviewer:**

**Date of Interview:**

**Time of Started:**

**Time Ended:**

---

**A. Awareness and functionality of government-run facilities and costs of waste management service**

1. What is the role of your office to the solid waste management in Calamba City/Barangay Looc?
2. Are you aware of any government-run facilities in your locality? (1) MRF? (2) Eco-centre?
  - a. If yes:
    1. Are the existent facilities functional?
      - 1.1. Yes: What are their functions?
      - 1.2. No: What do you think are needed to make these facilities functional?
    2. Do you think that these are efficient?
      - 2.1. Yes: Why?
      - 2.2. No: What do think are needed to make these facilities efficient? Why?
    3. Where are these facilities located? (Do you have monitoring reports?)
    4. Who manages these facilities?
  - b. If no:
    1. Do you think that these facilities are needed in your locality?
      - 1.1. Yes, why? Who/which office should initiate the construction of these facilities?
      - 1.2. No, why?
3. For Calamba City Solid Waste Management Task Force (CCSWMTF) and Barangay Captain:  
How much does the government spend to provide the waste management service in your locality?  
Who/which office decides this budget?  
Do you think this is reasonable? Why?

**B. Perception of the waste scenario**

1. What is your opinion on the current waste management system in your locality?
  - a. Proper: Why?
  - b. Improper: Why?
  - c. What were the criteria you used to say that the current system is proper/improper?
2. Do you think that there is a waste problem in your locality?
  - a. If yes:
    1. Can you elaborate what kind of waste problem?
    2. What do you think are the causes of this waste problem?
    3. What do you think are needed to address this waste problem?
    4. What do you think are the effects (impacts) of wastes to the following?
      - a. Environment
      - b. Health
    5. Which office do you think should resolve these issues on waste?
  - b. If no: What do you think are the more pressing problems in your locality?
    1. What do you think are the causes of these problems?
    2. What do you think are needed to address these problems?
    3. What do you think are the effects of these problems to the environment and health?
3. Who do think should be the key actors to address the waste management system in you locality?

### **C. Effectiveness and Efficiency of Projects, Campaigns, Programs, and Laws on Waste Management**

1. What are the projects, campaigns, and programs conducted by your office pertinent to waste management? (Let the key informant enumerate)

1.1. Do you think that these projects, campaigns, and programs are effective? Efficient?

a. If yes, what do you think are the reasons for the success of these initiatives?

b. If no, what do you think are the things needed to be undertaken in order to make these initiatives effective? Efficient?

1.2. What is the extent (impacts) of these initiatives?

1.3. Who benefits from these initiatives?

2. What do you think are the criteria for waste management initiatives to be successful?

3. What do you think are the reasons why waste management initiatives fail?

4. What are the laws/ordinances in your locality pertinent to waste management?

4.1. Do you think that these laws/ordinances are effective? Efficient?

a. If yes, what do you think are the reasons why these laws are effective? Efficient?

b. If no, what do you think are the things needed to be undertaken in order to make these laws/ordinances effective? Efficient?

4.2. What is the extent (impacts) of these laws/ordinances?

For City Office: How is RA 9003 implemented in the city?

Which specific provisions has the city implemented already?

Which provisions are yet to be implemented?

Concession agreement with Bella.

**Key Informant Interview for Private-Sector Waste Management Facilities**  
**Module A: KII Set 2 Bella**

---

**Name of Respondent:**

**Age of Respondent:**

**Name of Enterprise:**

**Location of Enterprise:**

**Name of Interviewer:**

**Date of Interview:**

**Time of Started:**

**Time Ended:**

---

**Background of Operation**

1. Who owns the enterprise?
2. How are you related to the owner of the company?
3. When did the company start to operate?
4. How did you become Calamba City's waste management service provider?
5. When did you start the service?
6. Until when is the concession agreement?
7. Can we have/can we see a copy of the concession agreement?
8. What specific services do you provide to the city?
9. How much is the cost of the service provision per year or per month? What are the major costs items and how much are they?
10. Can you describe the overall waste management service and time line (from collection trucks to landfill)?

**Perception of the role(s) of the junkshop in waste management**

1. What is your opinion on the current waste management system in Calamba City?
  - a. Proper: Why?
  - b. Improper: Why?
  - c. What were the criteria you used to say that the current system is proper/improper?
2. Do you think that there is a waste problem in Calamba City?
  - a. If yes:
    1. Can you elaborate what kind of waste problem?
    2. What do you think are the causes of this waste problem?
    3. What do you think are needed to address this waste problem?
    4. What do you think are the effects (impacts) of wastes to the following?
      - a. Environment
      - b. Health
    5. Which office do you think should resolve these issues on waste?
  - b. If no: What do you think are the more pressing problems in Calamba City?
    1. What do you think are the causes of these problems?
    2. What do you think are needed to address these problems?
    3. What do you think are the effects of these problems to the environment and health?
3. Who do think should be the key actors to address the waste management system in the city?
4. What do you think is/are the role/s of your company in the waste management system in the city? Do you think it is helpful? Why?

**Key Informant Interview for Private-Sector Waste Management Facilities**  
**Module A: KII Set 2 Ecocenters**

**Name of Respondent:**

**Age of Respondent:**

**Name of Enterprise:**

**Location of Enterprise:**

**Name of Interviewer:**

**Date of Interview:**

**Time of Started:**

**Time Ended:**

**Background**

1. Who owns this Ecocenter?
2. When did this Ecocenter start to operate?
3. Who initiated the utilization of an Ecocenter?
4. What is the area of this facility?
5. What is the responsibility of this Ecocenter to the waste management of the school/subdivision or barangay?

**Material and Income Flow**

1. Can you describe the waste processing in the Ecocenter (where wastes come from, wastes recycled, where sold after)? Fill the table below and draw a process diagram.

| Material | Volume/day | Origin | Transformed into? | Percent Recovered | Price |
|----------|------------|--------|-------------------|-------------------|-------|
|          |            |        |                   |                   |       |
|          |            |        |                   |                   |       |
|          |            |        |                   |                   |       |
|          |            |        |                   |                   |       |
|          |            |        |                   |                   |       |
|          |            |        |                   |                   |       |
|          |            |        |                   |                   |       |
|          |            |        |                   |                   |       |
|          |            |        |                   |                   |       |
|          |            |        |                   |                   |       |

2. Can you enumerate the items that you had to purchase or pay for before starting this Ecocenter?

| Item | Price | Date purchased | Expected lifespan |
|------|-------|----------------|-------------------|
|      |       |                |                   |
|      |       |                |                   |
|      |       |                |                   |
|      |       |                |                   |
|      |       |                |                   |
|      |       |                |                   |
|      |       |                |                   |

3. How much is the monthly operation and maintenance cost for this Ecocenter?

- a. Salaries for operation, maintenance, administration, and security
- b. Electricity and water bills
- c. Equipment and facility maintenance
- d. Supplies
- e. Residual/biodegradable waste disposal

**Perception of the waste scenario**

1. What is your opinion on the current waste management system in your locality?
  - a. Proper: Why?
  - b. Improper: Why?
  - c. What were the criteria you used to say that the current system is proper/improper?
2. Do you think that there is a waste problem in your locality?
  - a. If yes:
    1. Can you elaborate what kind of waste problem?
    2. What do you think are the causes of this waste problem?
    3. What do you think are needed to address this waste problem?
    4. What do you think are the effects (impacts) of wastes to the following?
      - a. Environment
      - b. Health
    5. Which office do you think should resolve these issues on waste?
  - b. If no: What do you think are the more pressing problems in your locality?
    1. What do you think are the causes of these problems?
    2. What do you think are needed to address these problems?
    3. What do you think are the effects of these problems to the environment and health?
3. Who do think should be the key actors to address the waste management system in you locality?

**Key Informant Interview for Private-Sector Waste Management Facilities**  
**Module A: KII Set 2 Junkshops**

---

**Name of Respondent:**

**Age of Respondent:**

**Name of Enterprise:**

**Location of Enterprise:**

**Name of Interviewer:**

**Date of Interview:**

**Time of Started:**

**Time Ended:**

---

**Background of Operation**

1. Who owns the enterprise?
2. How are you related to the owner of the enterprise?
3. When did the enterprise start to operate?
4. What is the area of the junkshop?

**Material and Income Flow**

1. Can you describe the waste processing in your facility (where wastes come from, wastes recycled, where sold after)? Draw diagram.
2. Please fill the table below.

Type of materials in the junkshop and price list

| Material | Unit | Volume/day | Buying price | Selling price |
|----------|------|------------|--------------|---------------|
|          |      |            |              |               |
|          |      |            |              |               |
|          |      |            |              |               |
|          |      |            |              |               |
|          |      |            |              |               |
|          |      |            |              |               |

3. Can you enumerate the items that you had to purchase or pay for before starting this junkshop?

| Item | Price | Date purchased | Expected lifespan |
|------|-------|----------------|-------------------|
|      |       |                |                   |
|      |       |                |                   |
|      |       |                |                   |
|      |       |                |                   |
|      |       |                |                   |
|      |       |                |                   |
|      |       |                |                   |

3. How much is the monthly operation and maintenance cost for this Junkshop?
  - a. Salaries for operation, maintenance, administration, and security
  - b. Electricity and water bills
  - c. Equipment and facility maintenance
  - d. Supplies
  - e. Residual/biodegradable waste disposal
6. What is the basis of costing the products procured/sold?

**Perception of the role(s) of the junkshop in waste management**

1. What is your opinion on the current waste management system in your locality?
  - a. Proper: Why?
  - b. Improper: Why?
  - c. What were the criteria you used to say that the current system is proper/improper?
2. Do you think that there is a waste problem in your locality?
  - a. If yes:

1. Can you elaborate what kind of waste problem?
  2. What do you think are the causes of this waste problem?
  3. What do you think are needed to address this waste problem?
  4. What do you think are the effects (impacts) of wastes to the following?
    - a. Environment
    - b. Health
  5. Which office do you think should resolve these issues on waste?
- b. If no: What do you think are the more pressing problems in your locality?
1. What do you think are the causes of these problems?
  2. What do you think are needed to address these problems?
  3. What do you think are the effects of these problems to the environment and health?
3. Who do think should be the key actors to address the waste management system in you locality?
4. What do you think is/are the role/s of junkshops in the waste management system in your locality?  
Do you think it is helpful? Why?
5. How many junkshops are operating in the same catchment areas? Do you consider them as collaborators or rivals? Why?

**Key Informant Interview for Private-Sector Waste Management Facilities**  
**Module A: KII Set 2 MRFs**

**Name of Respondent:**

**Age of Respondent:**

**Name of Enterprise:**

**Location of Enterprise:**

**Name of Interviewer:**

**Date of Interview:**

**Time of Started:**

**Time Ended:**

**Background**

1. Who owns this MRF?
2. When did this MRF start to operate?
3. What is the area of this facility?
4. What is the responsibility of this MRF to the waste management of the city?

**Material and Income Flow**

1. Can you describe the waste processing in the MRF (where wastes come from, wastes recycled, where sold after)? Fill the table below and draw a process diagram.

| Material | Volume/day | Origin | Transformed into? | Percent Recovered | Price |
|----------|------------|--------|-------------------|-------------------|-------|
|          |            |        |                   |                   |       |
|          |            |        |                   |                   |       |
|          |            |        |                   |                   |       |
|          |            |        |                   |                   |       |
|          |            |        |                   |                   |       |
|          |            |        |                   |                   |       |
|          |            |        |                   |                   |       |
|          |            |        |                   |                   |       |
|          |            |        |                   |                   |       |
|          |            |        |                   |                   |       |

2. Choose the kind of MRF from the table.

| MRF Capacity Range (tpd) | Type           | Investment         | Civil Works <sup>b</sup> | Equipment | Indirect Cost <sup>c</sup> | O&M | Basic Equipment                                                                                                                                                                     |
|--------------------------|----------------|--------------------|--------------------------|-----------|----------------------------|-----|-------------------------------------------------------------------------------------------------------------------------------------------------------------------------------------|
| ≤2                       | Manual         | 1.13               | 1                        | 0.03      | 0.1                        | 0.1 | Sorting table, weighing scale                                                                                                                                                       |
| 10–15                    | Semi-automated | 24.8 <sup>d</sup>  | 20.5                     | 2.5       | 1.8                        | 2.5 | Single-line conveyor, sorting table, small payloaders, small baler, weighing scales (2)                                                                                             |
| 40–50                    | Automated      | 68.5 <sup>e</sup>  | 33                       | 24        | 11.7                       | 7   | 1 sorting line with conveyor system, hopper, trommel, magnetic separator; 2 payloaders, 2 forklifts, 2 balers, and 2 weighing scales                                                |
| 80–100                   | Automated      | 121.8 <sup>f</sup> | 52.3                     | 57        | 12.5                       | 12  | 2 sorting lines with conveyor system, 2 hoppers, 2 trommels, 2 magnetic separators, 2 payloaders, 2 forklifts, 1 bottle perforator, 4 balers, 1 weigh bridge, and 4 weighing scales |

MRF = materials recovery facility, O&M = operations and maintenance, tpd = tons per day.

a Indicated cost does not include lot acquisition as this varies depending on the location, accessibility, and nearby land use.

b Includes site development, access road, fence and building construction, and utilities.

c Includes permitting, design, site investigation, training of personnel, and contingencies.



d 2010 cost at a consumer price index of 127.97.  
e 2005 cost at a consumer price index of 100.  
f 2006 cost at a consumer price index of 106.24.

### **Perception of the waste scenario**

1. What is your opinion on the current waste management system in your locality?
  - a. Proper: Why?
  - b. Improper: Why?
  - c. What were the criteria you used to say that the current system is proper/improper?
2. Do you think that there is a waste problem in your locality?
  - a. If yes:
    1. Can you elaborate what kind of waste problem?
    2. What do you think are the causes of this waste problem?
    3. What do you think are needed to address this waste problem?
    4. What do you think are the effects (impacts) of wastes to the following?
      - a. Environment
      - b. Health
    5. Which office do you think should resolve these issues on waste?
  - b. If no: What do you think are the more pressing problems in your locality?
    1. What do you think are the causes of these problems?
    2. What do you think are needed to address these problems?
    3. What do you think are the effects of these problems to the environment and health?
3. Who do think should be the key actors to address the waste management system in you locality?

**Key Informant Interview for Private-Sector Waste Management Facilities**  
**Module A: KII Set 2 Scrap Collectors**

---

**Name of Respondent:**

**Age of Respondent:**

**Name of Interviewer:**

**Date of Interview:**

**Time of Started:**

**Time Ended:**

---

**Background**

1. How long have you been working as a scrap collector?
2. Do you collect scraps daily? If no, how many times do you collect scraps in a week?
3. What kind of scraps do you collect? Do you collect only specific scraps?
4. How many households can you visit in a day?
5. Do you collect scraps only in your barangay? If no, how many barangays can you visit in a day?
6. Do you sell the scraps right after collection?
7. Where do you sell them and what factors do you consider in choosing the junkshop or other recycling facility to which you would sell the scraps?

**Material and Income Flow**

1. Fill the table below:

(Ask to fill out a list of items bought and sold in a day for an honorarium.)

| Material | Unit | Volume/day | Buying price | Selling price |
|----------|------|------------|--------------|---------------|
|          |      |            |              |               |
|          |      |            |              |               |
|          |      |            |              |               |
|          |      |            |              |               |
|          |      |            |              |               |
|          |      |            |              |               |

2. Can you enumerate the items that you had to purchase or pay for before you started collecting scraps?

| Item | Price | Date purchased | Expected lifespan |
|------|-------|----------------|-------------------|
|      |       |                |                   |
|      |       |                |                   |
|      |       |                |                   |
|      |       |                |                   |
|      |       |                |                   |
|      |       |                |                   |
|      |       |                |                   |

3. How much do you usually spend in a day, buying pet bottles, glass bottles, cans, etc.?
4. How much is your usual daily net income?
5. How much do you spend per day for snacks or water while collecting scraps? Other expenses?

**Perception of the role(s) of scrap collectors in waste management**

1. What is your opinion on the current waste management system in your locality?
  - a. Proper: Why?
  - b. Improper: Why?
  - c. What were the criteria you used to say that the current system is proper/improper?
2. Do you think that there is a waste problem in your locality?
  - a. If yes:
    1. Can you elaborate what kind of waste problem?
    2. What do you think are the causes of this waste problem?
    3. What do you think are needed to address this waste problem?

4. What do you think are the effects (impacts) of wastes to the following?
  - a. Environment
  - b. Health
5. Which office do you think should resolve these issues on waste?
- b. If no: What do you think are the more pressing problems in your locality?
  1. What do you think are the causes of these problems?
  2. What do you think are needed to address these problems?
  3. What do you think are the effects of these problems to the environment and health?
3. Who do think should be the key actors to address the waste management system in you locality?
4. What do you think is/are the role/s of scrap collectors in the waste management system in your locality? Do you think they are helpful? Why?

**Socio-Economic Assessment of Domestic Wastes in  
Barangay Looc, Calamba City**

|                                                                                                                |                |                       |                |
|----------------------------------------------------------------------------------------------------------------|----------------|-----------------------|----------------|
| <b>Project Area:</b> _____                                                                                     |                |                       |                |
| (Barangay/Sitio)                                                                                               | (Municipality) | (Province)            |                |
|                                                                                                                |                |                       |                |
| (Name of Enumerator)                                                                                           | (Date)         | (Time Started)        | (Time Ended)   |
|                                                                                                                |                |                       |                |
| <b>CERTIFICATION</b>                                                                                           |                |                       |                |
| (To be filled-up after the survey form has been completed)                                                     |                |                       |                |
| I hereby certify that this data set was obtained by me personally and in accordance to the instructions given. |                |                       |                |
|                                                                                                                |                |                       |                |
| Signature over Printed Name of Enumerator                                                                      |                | Date Completed/Edited | Date Submitted |
|                                                                                                                |                |                       |                |
| Noted: Signature over Printed Name of Reviewer                                                                 |                | Date Reviewed         | Date Approved  |

**The Socio-Economic Evaluation Team guarantees confidentiality of all information contained in this questionnaire**

|                                                                               |
|-------------------------------------------------------------------------------|
| <b>BLOCK I</b><br><b>General Socio-Demographic &amp; Economic Information</b> |
|-------------------------------------------------------------------------------|

**A. Basic Information on Household Members**

1. Name: \_\_\_\_\_ 1.a. Check if head of household ☐
1. b. If not head of household, what is your relation to the head of household? \_\_\_\_\_
- 1.1 Age: \_\_\_\_\_ 1.2. Gender: \_\_\_\_\_

2. Are you a migrant here?

☐ NO

☐ YES

2.1 Where did you live before coming here? \_\_\_\_\_

2.2 How many years have you stayed here? \_\_\_\_\_

3. Household size: \_\_\_\_\_ 3.1. Number of dependents: \_\_\_\_\_

4. Household Type (e.g. nuclear, extended) \_\_\_\_\_

5. Educational Attainment of the head of household:

☐ Elementary ☐ High School ☐ College ☐ Others (Please specify) \_\_\_\_\_

6. Employment status of the head of the household: ☐ Employed ☐ Unemployed

7. What is your family's primary source of living?

- |                                                          |                                                                      |                                        |
|----------------------------------------------------------|----------------------------------------------------------------------|----------------------------------------|
| <input type="checkbox"/> Agriculture                     | <input type="checkbox"/> Employed in a private company/agency        | <input type="checkbox"/> Pension       |
| <input type="checkbox"/> Fisheries                       | <input type="checkbox"/> Self-employed (i.e. small-scale enterprise) | <input type="checkbox"/> Others: _____ |
| <input type="checkbox"/> Employed in a government office | <input type="checkbox"/> Remittance                                  |                                        |



|                                                                |
|----------------------------------------------------------------|
| <b>BLOCK II</b>                                                |
| <b>Types of Wastes and Disposal Practices in the Household</b> |

### Types and Sources of Wastes

1. Who in the family is handling your solid wastes?

☐ Father      ☐ Mother      ☐ Others, specify \_\_\_\_\_

2. Date of last waste collection: \_\_\_\_\_

3. Please fill the table below for the types and amount of wastes generated/held by your household on the day of the interview. Also indicate the how you treat the wastes using the codes given in the separate sheet.

|                                       | Unit<br>(kg / pcs / cup ) | Quantity<br>(0, number,<br>or ?) | Primary<br>Practice<br>(Use Code) | Secondary<br>Practice<br>(Use Code) |
|---------------------------------------|---------------------------|----------------------------------|-----------------------------------|-------------------------------------|
| <b>Food Wastes</b>                    | kg / cups                 |                                  |                                   |                                     |
|                                       |                           |                                  |                                   |                                     |
| <b>Paper wastes</b>                   |                           |                                  |                                   |                                     |
| paper bag from grocery stores (brown) | kg / pcs /                |                                  |                                   |                                     |
| tissue                                | kg / pcs /                |                                  |                                   |                                     |
| tissue core                           | kg / pcs /                |                                  |                                   |                                     |
| receipt                               | kg / pcs /                |                                  |                                   |                                     |
| typewriting                           | kg / pcs /                |                                  |                                   |                                     |
|                                       |                           |                                  |                                   |                                     |
| <b>Boxes</b>                          |                           |                                  |                                   |                                     |
| shoe boxes                            | kg / pcs /                |                                  |                                   |                                     |
| pizza                                 | kg / pcs /                |                                  |                                   |                                     |
| soap                                  | kg / pcs /                |                                  |                                   |                                     |
| milk                                  | kg / pcs /                |                                  |                                   |                                     |
| cheese                                | kg / pcs /                |                                  |                                   |                                     |
| cake                                  | kg / pcs /                |                                  |                                   |                                     |
| fruit juices                          | kg / pcs /                |                                  |                                   |                                     |
|                                       |                           |                                  |                                   |                                     |
| <b>Plastics</b>                       |                           |                                  |                                   |                                     |
| <b>Pet bottles</b>                    |                           |                                  |                                   |                                     |
| 500 mL                                | kg / pcs /                |                                  |                                   |                                     |
| 1 L                                   | kg / pcs /                |                                  |                                   |                                     |
| 4L                                    | kg / pcs /                |                                  |                                   |                                     |
| Coke 1.75L                            | kg / pcs /                |                                  |                                   |                                     |
|                                       |                           |                                  |                                   |                                     |
| <b>Soft plastics</b>                  |                           |                                  |                                   |                                     |
| shampoo                               | kg / pcs /                |                                  |                                   |                                     |
| plastic bag                           | kg / pcs /                |                                  |                                   |                                     |
| sando bag small                       | kg / pcs /                |                                  |                                   |                                     |
| sando bag big                         | kg / pcs /                |                                  |                                   |                                     |
| toothpaste                            | kg / pcs /                |                                  |                                   |                                     |
| soap                                  | kg / pcs /                |                                  |                                   |                                     |

|                                    |            |  |  |  |
|------------------------------------|------------|--|--|--|
| laundry soap                       | kg / pcs / |  |  |  |
| seasoning (ajinomoto, magic sarap) | kg / pcs / |  |  |  |
| Soy sauce                          | kg / pcs / |  |  |  |
| noodles                            | kg / pcs / |  |  |  |
| chips                              | kg / pcs / |  |  |  |
| juice tetra pack                   | kg / pcs / |  |  |  |
| biscuits                           | kg / pcs / |  |  |  |
| home-made biscuits                 | kg / pcs / |  |  |  |
| small mixed nuts                   | kg / pcs / |  |  |  |
| candies                            | kg / pcs / |  |  |  |
| coffee                             | kg / pcs / |  |  |  |
| hotdogs                            | kg / pcs / |  |  |  |
| dishwashing soap                   | kg / pcs / |  |  |  |
| disposable s                       | kg / pcs / |  |  |  |
|                                    |            |  |  |  |
| <b>Hard plastics</b>               |            |  |  |  |
| shampoo bottle                     | kg / pcs / |  |  |  |
| bleach                             | kg / pcs / |  |  |  |
| lotion                             | kg / pcs / |  |  |  |
| deodorant                          | kg / pcs / |  |  |  |
| moisturizer                        | kg / pcs / |  |  |  |
| powder                             | kg / pcs / |  |  |  |
| seasoning                          | kg / pcs / |  |  |  |
| Soy sauce                          | kg / pcs / |  |  |  |
| dishwashing soap                   | kg / pcs / |  |  |  |
| laundry soap                       | kg / pcs / |  |  |  |
| plastic utensils                   | kg / pcs / |  |  |  |
| bucket                             | kg / pcs / |  |  |  |
| monoblock                          | kg / pcs / |  |  |  |
|                                    |            |  |  |  |
| <b>Glass Wastes</b>                |            |  |  |  |
| oil/seasoning                      | kg / pcs / |  |  |  |
| Sauce                              | kg / pcs / |  |  |  |
| liquor                             | kg / pcs / |  |  |  |
| medicine (amber)                   | kg / pcs / |  |  |  |
| vase                               | kg / pcs / |  |  |  |
| aquarium                           | kg / pcs / |  |  |  |
| windows (jalousie)                 | kg / pcs / |  |  |  |
| mirror                             | kg / pcs / |  |  |  |
| TV screen                          | kg / pcs / |  |  |  |
|                                    |            |  |  |  |
| <b>Metals</b>                      |            |  |  |  |
| Canned goods                       | kg / pcs / |  |  |  |
|                                    |            |  |  |  |
| <b>Rubber</b>                      |            |  |  |  |
| tires                              | kg / pcs / |  |  |  |
| slippers                           | kg / pcs / |  |  |  |
| shoes                              | kg / pcs / |  |  |  |

|                |            |  |  |  |
|----------------|------------|--|--|--|
|                |            |  |  |  |
| <b>Leather</b> |            |  |  |  |
| belt           | kg / pcs / |  |  |  |
| bag            | kg / pcs / |  |  |  |
|                |            |  |  |  |
| <b>Others</b>  |            |  |  |  |
| underwear      | kg / pcs / |  |  |  |
| clothes        | kg / pcs / |  |  |  |
| diaper         | kg / pcs / |  |  |  |
| napkin         | kg / pcs / |  |  |  |
| socks          | kg / pcs / |  |  |  |
| bed            | kg / pcs / |  |  |  |
| battery        | kg / pcs / |  |  |  |
| watch          | kg / pcs / |  |  |  |
|                |            |  |  |  |

4. Where do you store your garbage before it is disposed?

- ☐ trash can      ☐ plastic bag      ☐ others, specify \_\_\_\_\_  
☐ garbage bag      ☐ store room      ☐ cannot say

5. What is your opinion about your method of disposing household wastes?

- ☐ everyone else is doing it  
☐ can probably have problems in the end, please specify \_\_\_\_\_  
☐ satisfied, nothing is wrong  
☐ others, please specify \_\_\_\_\_  
☐ cannot say

|                                                                                                                           |
|---------------------------------------------------------------------------------------------------------------------------|
| <b>BLOCK III</b><br><b>Awareness on the Facilities, Ordinances, Programs, and</b><br><b>Services on Waste Segregation</b> |
|---------------------------------------------------------------------------------------------------------------------------|

#### A. Waste Management Facilities

1. Do you have any government-run waste management facility in your community?

☐ **NO**

1.1. If no, what do you think is the suitable waste management facility in your community? Explain.

\_\_\_\_\_

☐ **YES**

1.2. What is the type of waste management facility present in your community?

- ☐ Materials Recovery Facility (MRF)      ☐ Ecocentres

1.3. Where are these facilities located?

- ☐ in a strategic location within the barangay  
☐ in a proximal area in the barangay but is not readily accessed by ordinary community members  
☐ in an area away from the barangay but is ran by barangay office  
☐ cannot say



1.4. What do you think are the functions of these facilities?

- ☐ serve as a containment facility for recyclable materials  
☐ a communal area for organic waste disposal  
☐ convert recyclable materials into useful end products  
☐ an area designated for converting biodegradable wastes to fertilizer  
☐ cannot say

1.5. If yes, what can you say about the functionality and efficiency of these facilities?

- ☐ no idea  
☐ functional and efficient  
☐ functional but inefficient

1.5.1. What do you think are the things to be done to improve their efficiency?

---

☐ not functional

1.5. 2. What do you think are the things needed to functionalize these facilities?

---

2. Are there junk shops in the community?

☐ I don't know

☐ NO

2.1. Do you think the community will benefit with the existence of junkshops?

☐ Yes; what do you think are these benefits?

---

☐ No; why?

---

☐ YES

2.2. If yes, how many junkshops are there in the community?

☐ 1 to 5      ☐ 6 to 10      ☐ 10 to 20      ☐ more than 20

2.3. Do you sell your recyclable wastes in these junk shops?

☐ Yes      ☐ No

2.3.1. If yes, how often do you sell your recyclables to these junkshops?

☐ daily      ☐ monthly      ☐ cannot say

☐ weekly      ☐ depends on the volume, specify \_\_\_\_\_

2.3.2. How much do you get from selling your recyclables to these junk shops?

☐ PhP 10 to 50      ☐ PhP 501 to 1000  
☐ PhP 51 to 100      ☐ more than PhP 1000  
☐ PhP 101 to 500      ☐ cannot say

## B. Government Ordinances, Programs, and Services on Waste Management

1. Do you know any ordinance on waste management in your community?

☐ NO

1.1 What do you think are the ordinances that should be implemented in the barangay?

☐ YES

1.2. Kindly fill the table below.

| Ordinance | Follow?                                                  | Reason | Good/bad points of ordinance |
|-----------|----------------------------------------------------------|--------|------------------------------|
|           | <input type="checkbox"/> Yes <input type="checkbox"/> No |        |                              |
|           | <input type="checkbox"/> Yes <input type="checkbox"/> No |        |                              |
|           | <input type="checkbox"/> Yes <input type="checkbox"/> No |        |                              |
|           | <input type="checkbox"/> Yes <input type="checkbox"/> No |        |                              |
|           | <input type="checkbox"/> Yes <input type="checkbox"/> No |        |                              |

2. Do you know any waste management program in your community?

☐ NO

2.1 What do you think are the programs that should be implemented in the barangay?

☐ YES

2.2. Kindly fill the table below.

| Programs | Follow?                                                  | Reason | Good/bad points of programs |
|----------|----------------------------------------------------------|--------|-----------------------------|
|          | <input type="checkbox"/> Yes <input type="checkbox"/> No |        |                             |
|          | <input type="checkbox"/> Yes <input type="checkbox"/> No |        |                             |
|          | <input type="checkbox"/> Yes <input type="checkbox"/> No |        |                             |
|          | <input type="checkbox"/> Yes <input type="checkbox"/> No |        |                             |
|          | <input type="checkbox"/> Yes <input type="checkbox"/> No |        |                             |

3. In what ways do you think can the following be of help to manage waste in the community?

a. Local community people

\_\_\_\_\_

b. LGUs/Local Leaders

\_\_\_\_\_

c. Non-government organizations

\_\_\_\_\_

d. Others, specify (e.g. youth, women's sector)

\_\_\_\_\_

4. How often does the city collect waste from your house?

| Frequency                           | City          |                   |
|-------------------------------------|---------------|-------------------|
|                                     | Biodegradable | Non-Biodegradable |
| Daily                               |               |                   |
| Weekly:                             |               |                   |
| <input type="checkbox"/> Monday     |               |                   |
| <input type="checkbox"/> Tuesday    |               |                   |
| <input type="checkbox"/> Wednesday  |               |                   |
| <input type="checkbox"/> Thursday   |               |                   |
| <input type="checkbox"/> Friday     |               |                   |
| <input type="checkbox"/> Saturday   |               |                   |
| <input type="checkbox"/> Sunday     |               |                   |
| Others (specify):<br>_____<br>_____ |               |                   |

5. Are you satisfied with the current waste collection services of the city?

☐ Yes

☐ No; what do you think must be done?

---



---

**BLOCK IV**  
**Perceptions, Participation, and Willingness-to-pay for a**  
**Localized Solid Waste Management System**

**A. Perception of the waste scenario in the barangay**

1. Do you think that there is a waste problem in your barangay?

☐ No

☐ **YES**

1.1. What kind of problem is it?

---

1.2. What do you think are the things that should be done to address this problem?

- a) \_\_\_\_\_
- b) \_\_\_\_\_
- c) \_\_\_\_\_
- d) \_\_\_\_\_
- e) \_\_\_\_\_

2. Do you think that wastes have effects in the barangay?

☐ No

☐ **YES**

2.1. What are these? Kindly cite at least five (5) effects of wastes in the barangay which affect, affected, or continuously affecting your household and rank them according to the degrees of effect.

| Perceived Effects of Waste | Rank |
|----------------------------|------|
|                            |      |
|                            |      |
|                            |      |
|                            |      |

**B. Level of participation and willingness to engage in waste management**

3. Have you participated in any activity in the barangay pertinent to waste management?

☐ **NO**

3.1. Are you willing to participate in activities pertinent to waste management in your barangay?

☐ Yes

☐ No, why? \_\_\_\_\_

☐ **YES**

3.2. If yes, what are these activities? Kindly write the activities pertinent to waste management that you are willing to participate to.

- a) \_\_\_\_\_  
b) \_\_\_\_\_  
c) \_\_\_\_\_  
d) \_\_\_\_\_  
e) \_\_\_\_\_

4. Are you willing to have a localized waste management system in your barangay?

☐ **NO**

4.1. Why?

\_\_\_\_\_  
\_\_\_\_\_

☐ **YES**

4.2. A localized waste management system will entail costs of operations that will be shouldered by the barangay. How much are you willing to contribute to make this system operational?

PhP \_\_\_\_\_ Man hours

4.2.1. How often do you want to contribute?

☐ daily ☐ weekly ☐ monthly ☐ others, specify \_\_\_\_\_

5. Do you think that waste management is important? Why?

\_\_\_\_\_  
\_\_\_\_\_

**BLOCK V**  
**Economic Instruments for Solid Waste Management**

1. Do you pay for the waste management service provided for you by the city government?

☐ Yes How much? PhP \_\_\_\_\_

☐ No; why?

\_\_\_\_\_  
\_\_\_\_\_  
\_\_\_\_\_

2. What comes to mind when you hear the word "tax"? Write at most five words that are accompanied by this word.

- a) \_\_\_\_\_  
b) \_\_\_\_\_  
c) \_\_\_\_\_  
d) \_\_\_\_\_  
e) \_\_\_\_\_

2.1. Why did you choose these words?

- a) \_\_\_\_\_
- b) \_\_\_\_\_
- c) \_\_\_\_\_
- d) \_\_\_\_\_
- e) \_\_\_\_\_

3. Waste management, in general, entails the provision of rewards and application of reprimands. The former is applied if proper waste management is implemented and the latter if otherwise. Do you think that the application of these rewards and reprimands is applicable in your barangay?

☐ NO

3.1. If no, what do you think is the appropriate system that should be applied to your barangay pertinent to waste management?

\_\_\_\_\_  
\_\_\_\_\_  
\_\_\_\_\_

☐ YES

3.2. What do you think are the appropriate rewards that should be given if proper waste management is implemented?

\_\_\_\_\_  
\_\_\_\_\_

3.3. What do you think are the appropriate reprimands that should be applied if a household does not have a proper waste management system?

\_\_\_\_\_  
\_\_\_\_\_

4. Do you have access to the internet?

☐ NO

4.2. What do you think are the tools that should be used in disseminating information in your barangay? Why?

\_\_\_\_\_  
\_\_\_\_\_

☐ Yes

5. Do you have access in any social media?

☐ No

☐ YES

5.1. What are the social media that you have access to?

☐ Facebook ☐ Twitter ☐ Instagram ☐ Others, specify \_\_\_\_\_

5.2. In the selected social media, kindly write down at most five subjects that capture your interest and rank them according to the degree of interest.

| Selected Social Media | Subject | Rank |
|-----------------------|---------|------|
|                       |         |      |
|                       |         |      |
|                       |         |      |
|                       |         |      |
|                       |         |      |

5.3. Do you think that social media is an effective tool in disseminating information?

☐ Yes, why?

\_\_\_\_\_

☐ No, why?

\_\_\_\_\_

**BLOCK VI**  
**Floods and Solid Waste Management**

1. Have you ever been affected by flooding?

☐ No

☐ **YES**

1.1. When was the most recent flooding experience that you had? \_\_\_\_\_ (Month and Year)

1.2. What was the name of the typhoon/monsoon that caused the flooding? \_\_\_\_\_

1.3. How were you affected by the flood? Kindly fill out the table below.

| Category                        | Impacts |
|---------------------------------|---------|
| Livelihood/Jobs/Income          |         |
| Health                          |         |
| House/Infrastructure/Properties |         |
| Electrical service              |         |
| Others (specify):               |         |
|                                 |         |
|                                 |         |
|                                 |         |

1.4. Based on your opinion, what are the top 5 causes of flooding?

|     |
|-----|
| 1.  |
| 2.. |
| 3.  |
| 4.  |
| 5.  |
