# Supplementary material for: Perception and practice of household waste disposal: a participatory household survey in Calamba City, Philippines
Source: Research Square preprint supplement (doi:10.21203/rs.3.rs-119597/v1), 2020-12-10
Supplement: Supplementary file 2 [file 9c7f323d399e028f43e1cd49.pdf]

## S2 Waste Disposal Practice Codes

| Codes/signs | Main practice | Code | Detailed practice                 |
|-------------|---------------|------|-----------------------------------|
| Sunog       | <b>Burn</b>   | 10   |                                   |
|             | <b>Bury</b>   | 20   |                                   |
| Likod       |               | 21   | Backyard                          |
| Bukid       |               | 22   | Farm side                         |
| Tabing Ilog |               | 23   | Near river banks                  |
| Iba         |               | 24   | Other: specify in words           |
| Hindi       |               | 29   | Cannot say                        |
|             |               |      |                                   |
|             | <b>Leave</b>  | 30   |                                   |
| Kalsada     |               | 31   | Leave on the street               |
| Tambakan    |               | 32   | Discard in the communal container |
| Dumpsite    |               | 33   | Bring in dumpsite/designated area |
| Ipon        |               | 34   | Store to be collected             |
|             |               | 35   | Collect                           |
|             |               |      |                                   |
|             | <b>Throw</b>  | 40   |                                   |
| Ilog        |               | 41   | In river                          |
| Creek       |               | 42   | Creek                             |
| Lawa        |               | 43   | Lake                              |
| Iba         |               | 44   | Other: specify in words           |
| Hindi       |               | 49   | Cannot say                        |

## Waste Recycling Practices Codes used for the segregated items

| Codes/signs | Main practice | Code | Detailed practice                     |
|-------------|---------------|------|---------------------------------------|
|             | <b>Sell</b>   | 50   |                                       |
| Magbobote   |               | 51   | Sell to the collectors                |
| Junkshop    |               | 52   | Bring to sell at the junk shops       |
|             |               |      |                                       |
|             |               |      |                                       |
|             | <b>Give</b>   | 60   |                                       |
| Libre       |               | 61   | Give is to the collectors for free    |
| Bigay       |               | 62   | Give away to others who will use/sell |
|             |               |      |                                       |
|             |               |      |                                       |
|             | <b>Reuse</b>  | 70   |                                       |
| Pataba      |               | 71   | Use as compost                        |
| Pakain      |               | 72   | Feed animals                          |
|             |               | 73   | Use as firewood                       |
